# Supplementary material for: Representation of Industry in Introductory Biology Textbooks: A Missed Opportunity to Advance STEM Learning
Source: Atypon-hosted journal article supplement (doi:10.1187/cbe.17-03-0057), 2018-11-16
Supplement: combinedsupmats.pdf [file combinedsupmats.pdf]

# Supplemental Material

*CBE—Life Sciences Education*

Simon *et al.*

Supplemental Table 1: List of Textbooks Examined in this Study

| First Author          | Title                                                 | Edition            | Year |
|-----------------------|-------------------------------------------------------|--------------------|------|
| Audesirk, T. et al.   | Biology: Life on Earth                                | Seventh Edition    | 2005 |
| Belk, C. et al.       | Biology Science for Life with Physiology              | Second Edition     | 2007 |
| Belk, C. et al.       | Human Biology                                         |                    | 2009 |
| Brooker, R.J. et al.  | Biology                                               |                    | 2008 |
| Campbell, N.A. et al. | Essential Biology with Physiology                     |                    | 2004 |
| Campbell, N.A. et al. | Biology                                               | Eighth Edition     | 2008 |
| Chiras, D.D.          | Human Biology                                         | Sixth Edition      | 2008 |
| Enger, E. et al.      | Concepts in Biology                                   | Thirteenth Edition | 2009 |
| Freeman, S.           | Biological Science                                    | Third Edition      | 2008 |
| Goodenough, J. et al. | Biology of Humans: Concepts, Applications, and Issues | Second Edition     | 2007 |
| Gunstream, S.E.       | Biological Explorations: A Human Approach             | Sixth Edition      | 2009 |
| Hoefnagels, M.        | Biology: Concepts and Investigations                  |                    | 2009 |
| Ireland, K.A. et al.  | Visualizing Human Biology                             | Second Edition     | 2008 |
| Johnson, G.B. et al.  | The Living World                                      | Sixth Edition      | 2010 |
| Johnson, M.D.         | Human Biology: Concepts and Current Issues            | Fifth Edition      | 2010 |
| Krogh, D.             | Biology: A Guide to the Natural World                 | Third Edition      | 2005 |
| Krogh, D.             | A Brief Guide to Biology                              |                    | 2007 |
| Losos, J.B. et al.    | Biology                                               | Eighth Edition     | 2008 |
| Mader, S.S.           | Human Biology                                         | Ninth Edition      | 2006 |
| Mader, S.S.           | Essentials of Biology                                 |                    | 2007 |
| Phelan, J.            | What is Life? A Guide to Biology                      |                    | 2010 |
| Phelan, J.            | What is Life? A Guide to Biology with Physiology      |                    | 2011 |
| Russell, P.J. et al.  | Biology: The Dynamic Science                          |                    | 2008 |
| Sadava, D. et al.     | Life: The Science of Biology                          | Ninth Edition      | 2011 |
| Solomon, E.P. et al.  | Biology                                               | Eighth Edition     | 2008 |
| Starr, C. et al.      | Biology: Concepts and Applications                    | Sixth Edition      | 2006 |
| Starr, C. et al.      | Biology: The Unity and Diversity of Life              | Eleventh Edition   | 2006 |
| Starr, C. et al.      | Biology: Today and Tomorrow with Physiology           | Second Edition     | 2007 |
| Starr, C. et al.      | Human Biology                                         | Seventh Edition    | 2007 |

Supplemental Table 2: Coding Guidebook

| Code                                                                                                                                                                          | Definition                                                                                                                                                                                                 | Includes                                                                                                                                                                                                                                                                                                                                                                   | Excludes                                                                                                                                                                                                                                                                                                                                                     |
|-------------------------------------------------------------------------------------------------------------------------------------------------------------------------------|------------------------------------------------------------------------------------------------------------------------------------------------------------------------------------------------------------|----------------------------------------------------------------------------------------------------------------------------------------------------------------------------------------------------------------------------------------------------------------------------------------------------------------------------------------------------------------------------|--------------------------------------------------------------------------------------------------------------------------------------------------------------------------------------------------------------------------------------------------------------------------------------------------------------------------------------------------------------|
| <p>Note: all codes refer to the context of the word recovered from the string search. Additional implications of a business entity within the passage are not considered.</p> |                                                                                                                                                                                                            |                                                                                                                                                                                                                                                                                                                                                                            |                                                                                                                                                                                                                                                                                                                                                              |
| Career Relevant                                                                                                                                                               | Pertaining to examples of careers that benefit from a STEM major, or use of STEM learning in other careers                                                                                                 | Potential occupations within STEM careers, including academia and industry; examples of how STEM learning and thought processes can help practitioners in either general or specific career trajectories.                                                                                                                                                                  | Biographies, acknowledgements, credits                                                                                                                                                                                                                                                                                                                       |
| Career: Other Use of Term                                                                                                                                                     | Fails to comply with definition of Career Relevant; use of search term as metaphor or analogy for biological process; synonym                                                                              | "Occupation" used to describe spatial location; general analogies or descriptions of life stages; biography, interview, acknowledgement, or credit for data or illustration; exemplar cartoon; demographic description; employment discrimination                                                                                                                          | Discussion of potential career paths for STEM majors or use of STEM learning for non-STEM career paths.                                                                                                                                                                                                                                                      |
| Industry Relevant                                                                                                                                                             | Pertaining to an entity, structure, or practice that involves interaction with the economy through the exchange of money. Use of term in relation to an organization, company, corporation, business, etc. | Commercial farming; general careers; specific company names; Industrial Revolution; biotechnology, pharmaceutical, or energy company; descriptive analogy to biology (simile e.g. "just as a business does...")                                                                                                                                                            | References, acknowledgements, copyright page, index, table of contents, single-word or short-phrase metaphorical use of term to explain a biological phenomenon, non-business meaning of the term (e.g. "incorporated" as a part of biological entity rather than as a business entity), publishing credits                                                  |
| Industry: Other Use of Term                                                                                                                                                   | Fails to comply with definition of Business Relevant; use of search term as descriptor for biological process                                                                                              | References, acknowledgements, copyright page, index, table of contents, single-word or short-phrase metaphorical use of term to explain a biological phenomenon, non-business meaning of the term (e.g. "incorporated" as a part of biological entity rather than as a business entity), publishing credits                                                                | Any reference that involves exchange of money within the economy                                                                                                                                                                                                                                                                                             |
| Health & Human Impact                                                                                                                                                         | Pertaining to human health and wellness through food, drugs or other therapies, lifestyle, or environmental factors                                                                                        | Genetics in context of disease, human genomics, Human Genome Project, human genome sequencing, antibiotic resistance in context of humans suffering from infection, food & nutrition, sexual & behavioral health, industrial practices correlating with disease risk                                                                                                       | Antibiotic resistance in context of bacteria, secondary health effects of primary research, basic research without direct health implications, crops specifically used for biofuel production                                                                                                                                                                |
| Environmental Impact                                                                                                                                                          | Pertaining to preservation of global or local ecosystem's health or diversity; industry's impact on the environment                                                                                        | Energy, biodiversity, bioremediation, indigenous human economic stability, environmental sustainability, agriculture, fertilizer or nitrogen fixation, natural resources, industrial soot or pollution, environmental justice, GM crops or organic farming practices                                                                                                       | Microenvironments (smaller than human-sized environment), antibiotic resistance unless as a result of environmental change, business or industrial environments, behavior of a single species, environmental impact on industry, extermination industry; interspecies interaction; industrial melanism                                                       |
| Positive Connotation                                                                                                                                                          | Relates explicitly to action of business on populations, society or environment that have, or are intended to have, a beneficial impact                                                                    | Positive impact on health, human welfare, food production, remediation, standard of living, jobs, earnings, or profit; new or growing industries or opportunities; value creation; problem-solving; commercial [positive noun]; Human Genome Project; increased survivorship during Industrial Revolution; fertilizer improving food production                            | Alteration, "change" unless a clear change to better circumstances, consequence, impact of populations or environment on business, unethical practices, any colorimetric change, general significance in absence of value judgement, description of commercial products and/or services; population increase during Industrial Revolution; fertilizer runoff |
| Negative Connotation                                                                                                                                                          | Relates explicitly to action of business on populations, society, individuals, or environment that have, or are intended to have a detrimental impact                                                      | Loss of genetic diversity; negative impact on health, human welfare, food production, environment even if remediated; unethical practices and behaviors; expense; cost; resource consumption, depletion, limitation, or exploitation; waste; excess; detriment to health or environment; delusion; industrial soot or pollution; CO2 emissions; commercial [negative noun] | Profit; any quantification unless accompanied by negative value judgement; resource utilization; colorimetric change; impact of populations or environments on business; industrial melanism; patents restricting information                                                                                                                                |
| Synergy                                                                                                                                                                       | Science incorporated into or supporting the growth or practice of business                                                                                                                                 | Company-sponsored research projects; biotechnology company; scientific research, R&D protocols, or results in company context; technical publication by industrial team; patent filing, licensing, or protection; company employing or collaborating with scientist or engineer; clinical trial or equivalent trial of non-therapeutic product                             | General environmental preservation goals or practices; passive by-products of business practices that open new scientific inquiry; comparison between science and business practices, hypothetical project proposals, general technology or industrial procedures or services, high-tech services                                                            |
| Conflict                                                                                                                                                                      | Business interfering with the practice of science, or science interfering with the practice of business                                                                                                    | Difficulties in scientific inquiry based on business practices, unethical science or scientific practices, restriction on research from patents, restriction on publication based on funding source, direct blockage of science by business or business by science, questioning validity of scientific results based on industry point of view                             | General environmental degradation or change, patents or protections in general (i.e. protecting intellectual property); conflicts in priorities, procedures, or goals between the practice of business and the practice of science                                                                                                                           |

Supplemental Table 3: Inter-Rater Reliability (IRR, calculated using Cohen’s kappa coefficient)

| Search Term           | Business Relevant | Positive Connotations | Negative Connotations | Both Positive and Negative (balanced) | Synergy | Conflict |
|-----------------------|-------------------|-----------------------|-----------------------|---------------------------------------|---------|----------|
| All                   | 99.13%            | 92.66%                | 97.63%                | 92.12%                                | 93.30%  | 100.00%  |
| Health & Human Impact | 94.86%            | 92.54%                | 97.24%                | 94.74%                                |         |          |
| Environmental Impact  | 93.88%            | 94.89%                | 98.78%                | 90.30%                                |         |          |

|              |         |         |         |
|--------------|---------|---------|---------|
| Business     | 100.00% | 95.77%  | 91.26%  |
| Commerce     | 100.00% | 100.00% | N/A     |
| Commercial   | 89.33%  | 95.39%  | 89.22%  |
| Company      | 95.98%  | 100.00% | 100.00% |
| Corporate    | 100.00% | 100.00% | N/A     |
| Corporation  | 81.08%  | 85.91%  | 77.42%  |
| Earnings     | 100.00% | N/A     | N/A     |
| Income       | 90.68%  | N/A     | N/A     |
| Incorporated | N/A     | N/A     | N/A     |
| Industrial   | 91.14%  | 97.41%  | 81.97%  |
| Industry     | 92.12%  | 99.15%  | 94.06%  |
| Profit       | 94.55%  | 95.22%  | 91.89%  |
| Revenue      | 100.00% | 100.00% | 100.00% |
